# Supplementary figures and images for: Routine CTA screening identifies blunt cerebrovascular injuries missed by clinical risk factors
Source: HighWire-hosted journal article supplement (doi:10.1136/tsaco-2022-000924), 2022-08-01

Supplemental Figure 1: BCVI Treatment Protocol

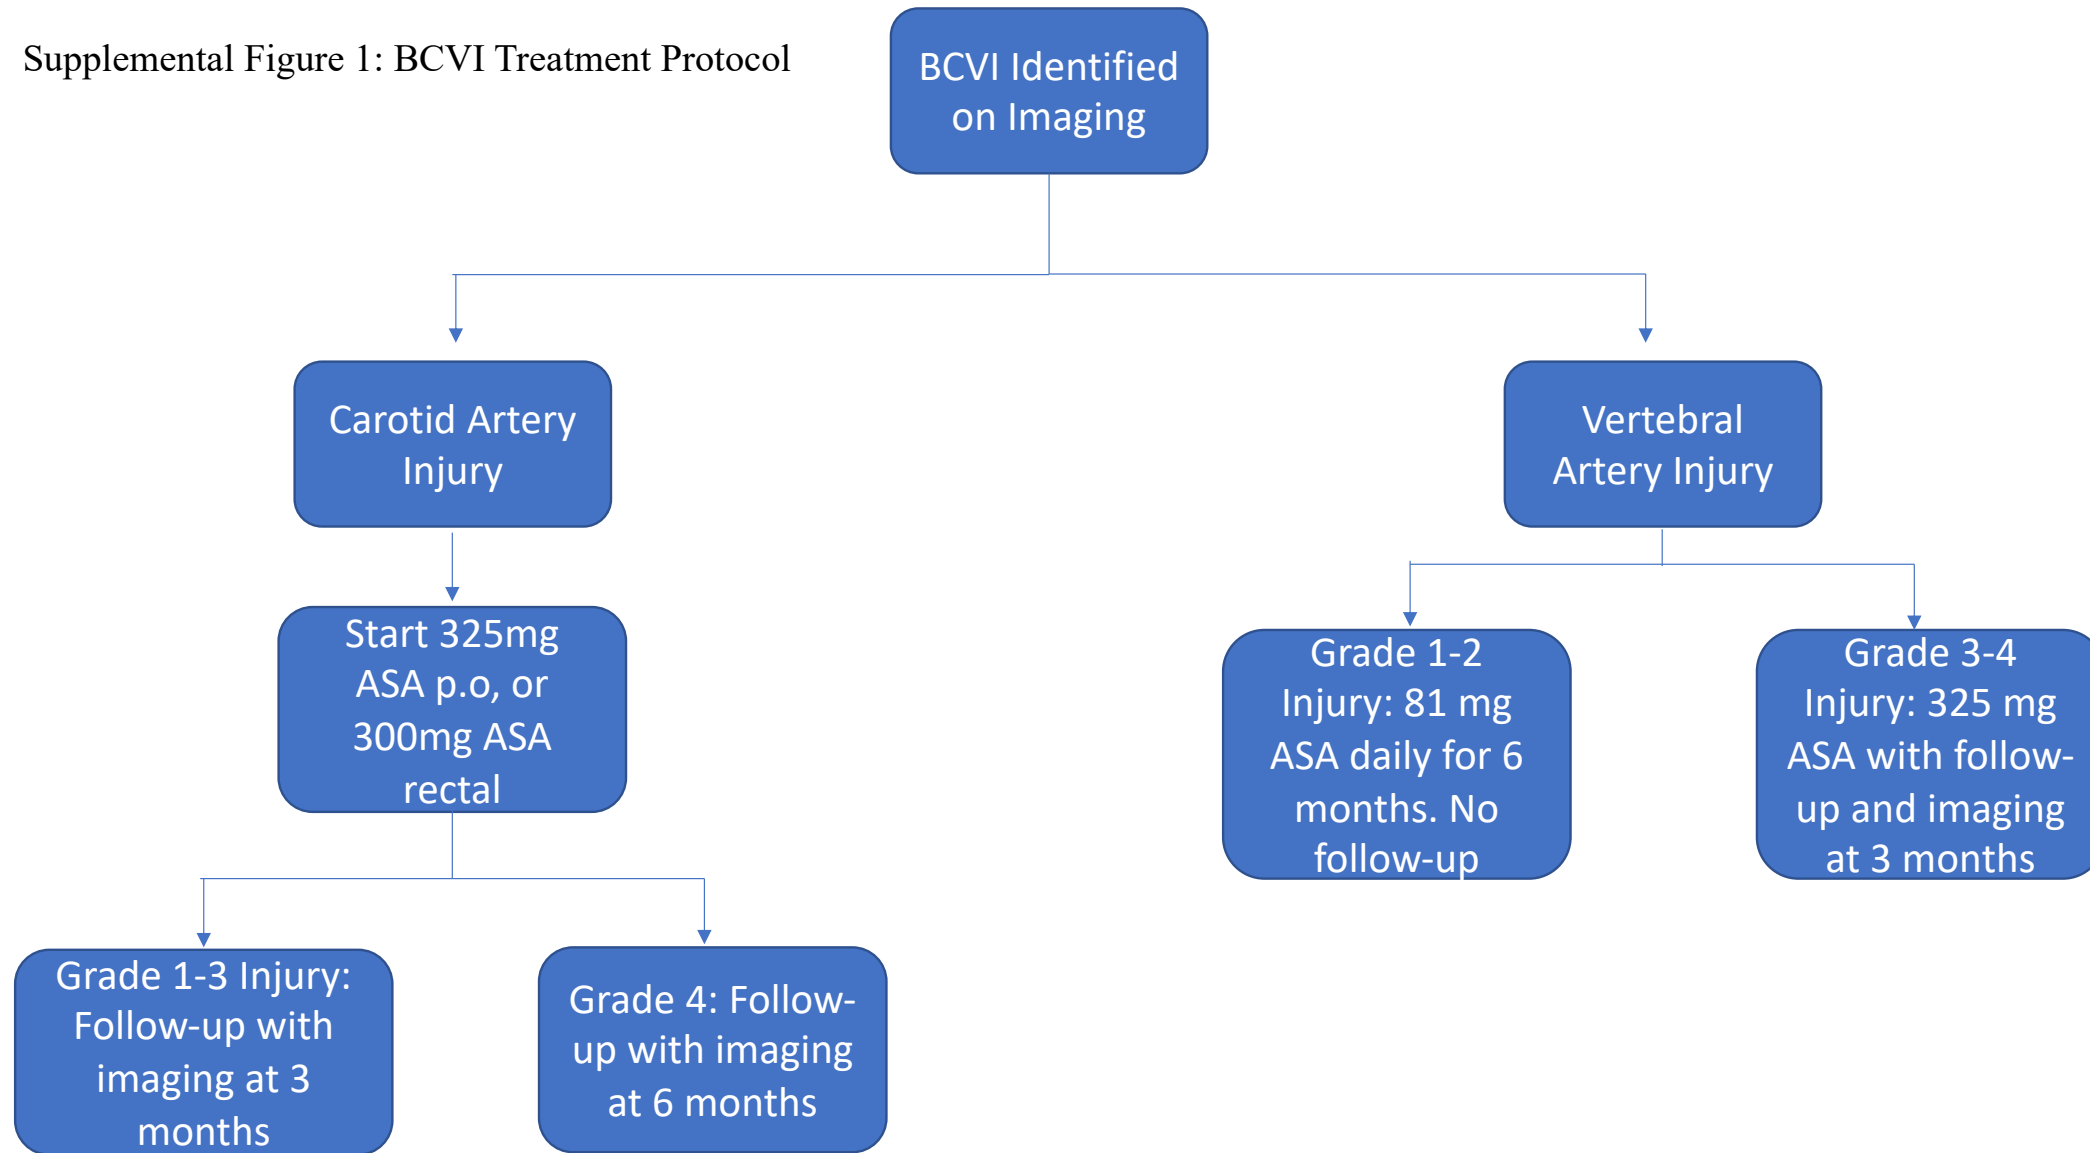

Supplement: tsaco-2022-000924supp001_data_supplement.pdf [file tsaco-2022-000924supp001_data_supplement.pdf]
